# Supplementary material
Source: PubMed Central journal article supplement (PMC8973455)
Supplement: NIHMS1730722-supplement-1.pdf [file NIHMS1730722-supplement-1.pdf]

**Supplemental Table 1: Characteristics and Responses from 51 Patients Completing Survey:****Survey:**

|                                                                        |                  |
|------------------------------------------------------------------------|------------------|
| Age, years (median, IQR)                                               | 65.0 (59.2-69.0) |
| Female                                                                 | 29 (56.7%)       |
| White                                                                  | 50 (98.0%)       |
| Cirrhosis                                                              | 35 (68.6%)       |
| Highest Level of Education:                                            |                  |
| Completed high school                                                  | 6 (11.8%)        |
| Completed some college or 2-year degree                                | 19 (37.3%)       |
| Completed 4-year college degree or higher                              | 26 (51.0%)       |
| Annual Household Income*:                                              |                  |
| < \$20,000                                                             | 7 (14.3%)        |
| > \$20,000 but < \$40,000                                              | 11 (22.4%)       |
| > \$40,000 but < \$60,000                                              | 6 (12.2%)        |
| > \$60,000                                                             | 25 (51.0%)       |
| Employment Status:                                                     |                  |
| Retired                                                                | 26 (51.0%)       |
| Full-time employment                                                   | 10 (19.6%)       |
| Part-time employment                                                   | 4 (7.8%)         |
| Unemployed but looking for work                                        | 3 (5.9%)         |
| Homemaker                                                              | 3 (5.9%)         |
| Other                                                                  | 5 (9.8%)         |
| Caregiver (yes)                                                        | 34 (66.7%)       |
| Vision makes reading smartphone, tablet, or desktop computer difficult | 6 (11.8%)        |
| Hearing makes participating in telephone/video calls difficult         | 2 (3.9%)         |
| <b>Access, Tools, and Use:</b>                                         |                  |
| Internet Access (Yes)                                                  | 49 (96.1%)       |
| Always/Mostly reliable                                                 | 45 (91.8%)       |
| Smartphone Ownership                                                   | 47 (92.2%)       |
| Tablet Computer Ownership with Camera                                  | 31 (60.8%)       |
| Desktop/Laptop Computer Ownership with Camera                          | 34 (66.7%)       |
| Can download applications onto smartphone*                             | 35 (71.4%)       |
| Use of smartphone, tablet, or computer to communicate by video         |                  |
| Daily                                                                  | 7 (13.7%)        |
| Multiple times per week                                                | 7 (13.7%)        |
| Once a week or every other week                                        | 8 (15.7%)        |
| Once a month                                                           | 7 (13.7%)        |
| Rarely/Never                                                           | 22 (43.1%)       |
| Portal Account Active                                                  | 51 (100%)        |
| <b>Televisit Questions:</b>                                            |                  |
| Do you recall being offered a video visit with your liver specialist?  |                  |
| Yes, but I declined                                                    | 6 (11.8%)        |

|                                                                              |            |
|------------------------------------------------------------------------------|------------|
| Yes, I accepted and completed the video visit                                | 26 (51.0%) |
| Yes, I accepted but did not complete the video visit                         | 6 (11.8%)  |
| No, but I would have declined                                                | 4 (7.8%)   |
| No, but I would have accepted                                                | 9 (17.6%)  |
| <i>Reasons for why video visit was (or would have been) declined (N=8*):</i> |            |
| Do not have the necessary devices                                            | 4 (50.0%)  |
| Privacy concerns                                                             | 3 (37.5%)  |
| Insurance coverage concerns                                                  | 1 (12.5%)  |
| Process was too complicated                                                  | 2 (25.0%)  |
| Difficulty accessing internet                                                | 1 (12.5%)  |
| Would be too impersonal                                                      | 1 (12.5%)  |
| <i>Offered a video visit but declined (N=6):</i>                             |            |
| Would have accepted a video visit if could have used alternative method      | 0          |
| <i>Accepted but did not complete the video visit (N=6):</i>                  |            |
| <i>Reason for why accepted video visit but did not complete:</i>             |            |
| Technical issues                                                             | 4 (66.7%)  |
| Would be too impersonal                                                      | 1 (16.7%)  |
| Devices, Privacy, Insurance, Process, Scheduling, Internet                   | 0          |
| Would have completed the video visit if could have used alternative method   | 4 (66.7%)  |
| <i>Accepted and completed the video visit (N=26):</i>                        |            |
| Would agree to a video visit again in the future                             | 24 (92.3%) |

\*Two patients did not answer this question  
 IQR, Interquartile Range
